# Supplementary material for: Calibration of global MODIS cloud amount using CALIOP cloud profiles
Source: Copernicus journal article supplement (doi:10.5194/amt-13-4995-2020), 2020-09-25
Supplement: Supplementary file [file amt-13-4995-2020-supplement.pdf]

Supplement of Atmos. Meas. Tech., 13, 4995–5012, 2020  
<https://doi.org/10.5194/amt-13-4995-2020-supplement>  
© Author(s) 2020. This work is distributed under  
the Creative Commons Attribution 4.0 License.

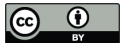

*Supplement of*

## **Calibration of global MODIS cloud amount using CALIOP cloud profiles**

**Andrzej Z. Kotarba**

*Correspondence to:* Andrzej Z. Kotarba (akotarba@cbk.waw.pl)

The copyright of individual parts of the supplement might differ from the CC BY 4.0 License.

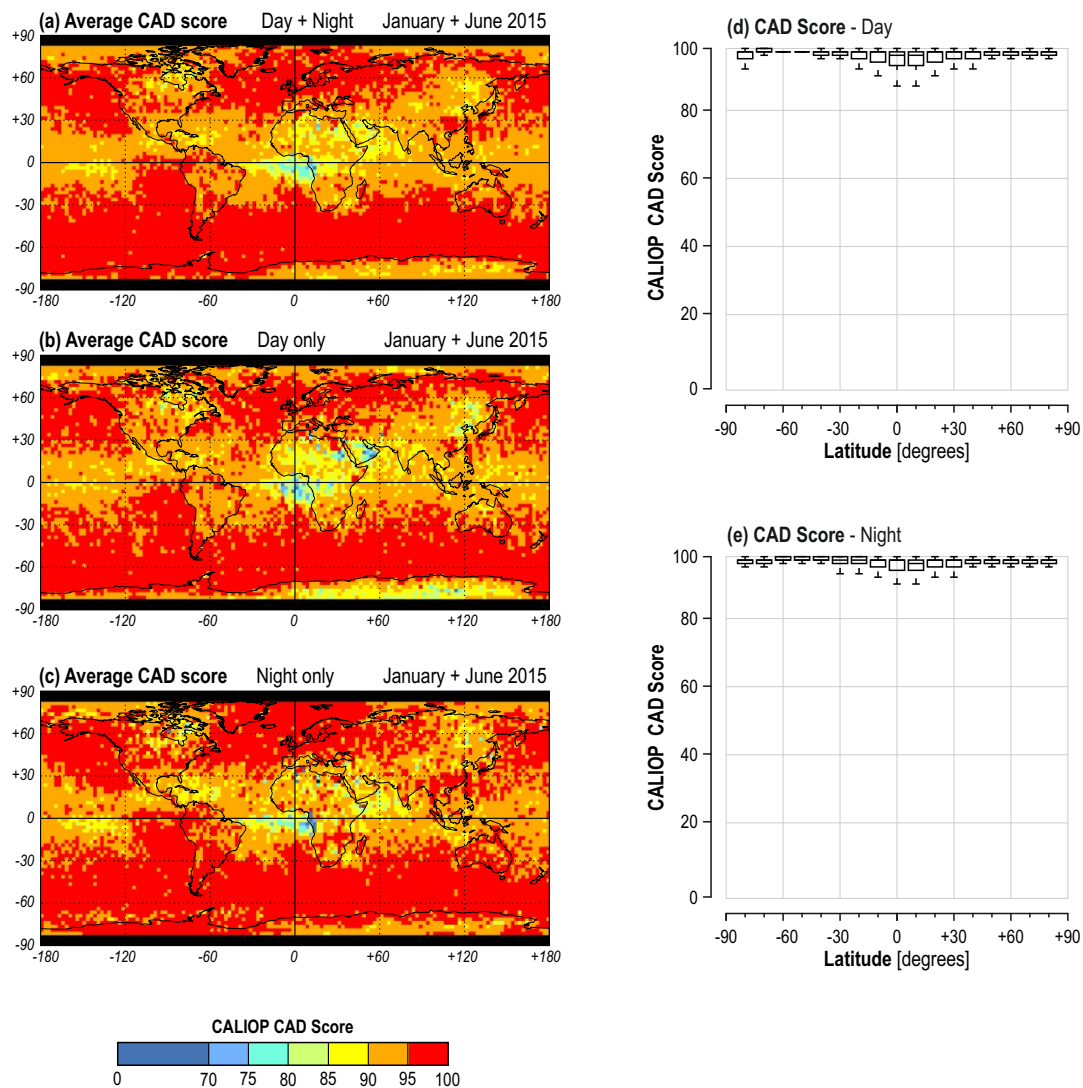

**Figure S1.** Overall accuracy of MODIS cloud detection as a function of the temporal (a, c) and spatial (b, d) separation of MODIS and CALIOP IFOVs. Top plots show the frequency of observations for individual time (a) and distance (b) ranges, while bottom plots report accuracy for these ranges. MODIS detections are validated using CALIOP cloud profiles as a reference. Accuracy is defined as the ratio of MODIS true detections (true positive and true negative) to all MODIS observations (see Table 1 in the main text for details).

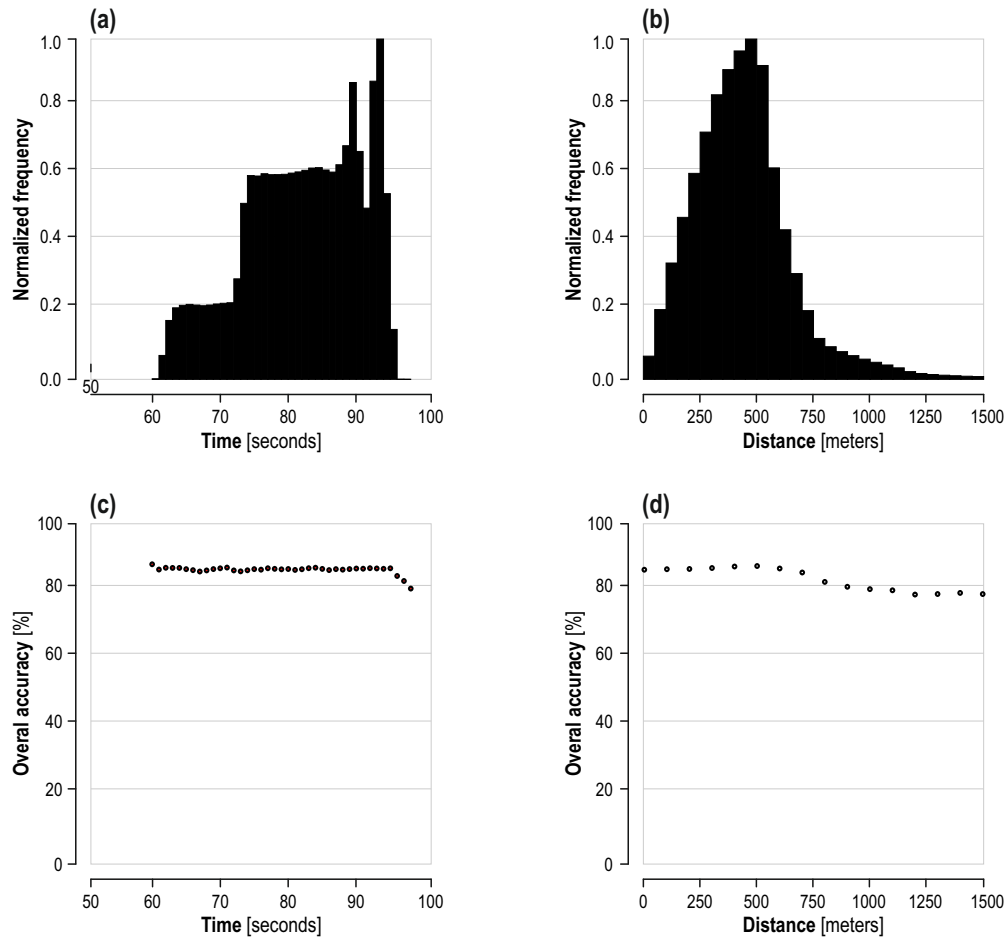

**Figure S2.** The average cloud-aerosol discrimination (CAD) score for CALIOP cloud data used in the study. Maps show spatial variation in the CAD score during the day (b), at night (c), and regardless of the time of the day (a). These plots demonstrate the high stability of CAD scores at various latitudes during the day (d) and at night (e).
